# Supplementary material for: Two-Dimensional Transition Metal-Hexaaminobenzene Monolayer Single-Atom Catalyst for Electrocatalytic Carbon Dioxide Reduction
Source: MDPI journal article supplement (doi:10.3390/nano12224005), 2022-11-14
Supplement: s1 [file s1]

## Supplementary Materials

### Two-Dimensional Transition Metal-Hexaaminobenzene

### Monolayer Single-Atom Catalyst for Electrocatalytic Carbon Dioxide Reduction

Table S1. Lattice constant a and b of TM-HAB in Å, where TM are the metal atoms of the first transition metal series.

| TM-HAB | Lattice(a) | Lattice(b) |
|--------|------------|------------|
| Sc-HAB | 14.000     | 14.000     |
| Ti-HAB | 13.648     | 13.731     |
| V-HAB  | 13.924     | 13.746     |
| Cr-HAB | 13.830     | 13.782     |
| Mn-HAB | 14.765     | 13.274     |
| Fe-HAB | 14.000     | 14.316     |
| Co-HAB | 14.550     | 13.279     |
| Ni-HAB | 13.419     | 13.417     |
| Cu-HAB | 13.695     | 13.761     |
| Zn-HAB | 14.014     | 13.997     |

Table S2.  $E_c$  is the cohesive energy of the bulk TM,  $E_b$  is the binding energy between the TM and the TM-HAB, and  $E_f$  is the formation energy of TM-HAB, where TM are the metal atoms of the first transition metal series.

| TM-HAB | $E_b(\text{eV})$ | $E_c(\text{eV})$ | $E_f(\text{eV})$ |
|--------|------------------|------------------|------------------|
| TM-Sc  | -12.049          | -4.423           | -7.877           |
| TM-Ti  | -13.309          | -5.956           | -6.285           |
| TM-V   | -11.967          | -6.578           | -5.316           |
| TM-Cr  | -9.710           | -4.011           | -5.169           |
| TM-Mn  | -10.524          | -3.761           | -4.706           |
| TM-Fe  | -10.476          | -5.264           | -5.122           |
| TM-Co  | -11.181          | -6.051           | -3.831           |
| TM-Ni  | -10.928          | -6.017           | -4.442           |
| TM-Cu  | -6.991           | -3.431           | -2.587           |
| Zn     | -5.379           | -1.054           | -3.871           |

(1) $E_b$  is binding energy of metal atoms on the HAB, which is calculated by:

$$E_b = E_{TM-HAB} - E_{TM} - E_{HAB},$$

where the  $E_{TM-HAB}$ ,  $E_{HAB}$  and  $E_{TM}$  are the energies of TM-HAB, HAB and metal atoms.

(2) $E_c$  is the cohesive energy of metals, which is calculated by:

$$E_c = (E_{M(bulk)} - nE_M) / n$$

where the  $E_{M(bulk)}$  is the energy of metal crystal,  $E_M$  is the energy of single metal atoms and  $n$  is the number of metal atoms in the crystal.

(3) $E_f$  is the formation energy of TM-HAB, which is calculated by

$$E_f = E_{TM-HAB} - n_{TM}\mu_{TM} - n_C\mu_C - n_N\mu_N - n_H\mu_H$$

where the  $E_{TM-HAB}$  are the energies of TM-HAB,  $n_{TM}$ ,  $n_C$ ,  $n_N$  and  $n_H$  are the number of TM, C, N and H, respectively.  $\mu_{TM}$ ,  $\mu_C$ ,  $\mu_N$  and  $\mu_H$  are the chemical potential of TM, C, N and H, respectively.

Table S3. Gibbs free energy change ( $\Delta G/\text{eV}$ ) of the first protonation step in the  $\text{CO}_2$  reduction reaction ( $\text{CO}_2\text{RR}$ ) and  $\text{H}_2$  evolution reaction (HER) on the TM-HAB.

| TM-HAB | $\Delta G[*\text{H}]$ | $\Delta G[*\text{COOH}]$ | $\Delta G[*\text{OCHO}]$ |
|--------|-----------------------|--------------------------|--------------------------|
| Sc-HAB | 0.061                 | -0.526                   | -2.366                   |
| Ti-HAB | -0.496                | -0.726                   | -2.126                   |
| V-HAB  | -0.373                | -0.803                   | -0.713                   |
| Cr-HAB | -0.247                | -0.572                   | -1.344                   |
| Mn-HAB | 0.118                 | -0.263                   | -0.826                   |
| Fe-HAB | 0.011                 | -0.351                   | -0.652                   |
| Co-HAB | -0.410                | -0.865                   | -0.995                   |
| Ni-HAB | -1.058                | -1.277                   | -2.039                   |
| Cu-HAB | 0.741                 | 0.162                    | -0.742                   |
| Zn-HAB | 0.996                 | -0.066                   | -1.398                   |

Table S4. Gibbs free energy change for each protonation step of Zn-HAB electrocatalytic CO<sub>2</sub> reduction.

| n(H <sup>+</sup> + e <sup>-</sup> )transferred | Chemical reaction equation                                         | ΔG     |
|------------------------------------------------|--------------------------------------------------------------------|--------|
| 1                                              | * + CO <sub>2</sub> + H <sup>+</sup> + e <sup>-</sup> → *COOH      | 0.933  |
|                                                | * + CO <sub>2</sub> + H <sup>+</sup> + e <sup>-</sup> → *OCHO      | -0.398 |
| 2                                              | *OCHO + H <sup>+</sup> + e <sup>-</sup> → *OCHOH                   | -0.061 |
| 3                                              | *OCHOH + H <sup>+</sup> + e <sup>-</sup> → *CHO + H <sub>2</sub> O | 1.314  |
|                                                | *OCHOH + H <sup>+</sup> + e <sup>-</sup> → *OCH + H <sub>2</sub> O | 1.291  |
|                                                | *OCHOH → * + HCOOH                                                 | 0.243  |

Table S5. Gibbs free energy change for each protonation step of Co-HAB electrocatalytic CO<sub>2</sub> reduction.

| n(H <sup>+</sup> + e <sup>-</sup> )transferred | Chemical reaction equation                                                                                           | ΔG     |
|------------------------------------------------|----------------------------------------------------------------------------------------------------------------------|--------|
| 1                                              | * + CO <sub>2</sub> + H <sup>+</sup> + e <sup>-</sup> → *COOH                                                        | -0.865 |
|                                                | * + CO <sub>2</sub> + H <sup>+</sup> + e <sup>-</sup> → *OCHO                                                        | -0.995 |
| 2                                              | *COOH + H <sup>+</sup> + e <sup>-</sup> → *CO + H <sub>2</sub> O                                                     | -0.064 |
|                                                | *OCHO + H <sup>+</sup> + e <sup>-</sup> → *OCHOH                                                                     | 2.630  |
| 3                                              | *CO + H <sub>2</sub> O + H <sup>+</sup> + e <sup>-</sup> → *CHO + H <sub>2</sub> O                                   | -0.226 |
|                                                | *CO + H <sub>2</sub> O + H <sup>+</sup> + e <sup>-</sup> → *COH + H <sub>2</sub> O                                   | 1.732  |
| 4                                              | *CHO + H <sub>2</sub> O + H <sup>+</sup> + e <sup>-</sup> → *OCH <sub>2</sub> + H <sub>2</sub> O                     | 0.532  |
| 5                                              | *OCH <sub>2</sub> + H <sub>2</sub> O + H <sup>+</sup> + e <sup>-</sup> → *OCH <sub>3</sub> + H <sub>2</sub> O        | -0.709 |
| 6                                              | *OCH <sub>3</sub> + H <sub>2</sub> O + H <sup>+</sup> + e <sup>-</sup> → *CH <sub>3</sub> OH + H <sub>2</sub> O      | -0.475 |
|                                                | *OCH <sub>3</sub> + H <sub>2</sub> O + H <sup>+</sup> + e <sup>-</sup> → *O + CH <sub>4</sub> + H <sub>2</sub> O     | -0.081 |
| 7                                              | *O + CH <sub>4</sub> + H <sub>2</sub> O + H <sup>+</sup> + e <sup>-</sup> → *OH + CH <sub>4</sub> + H <sub>2</sub> O | -1.148 |
|                                                | *CH <sub>3</sub> OH + H <sub>2</sub> O + H <sup>+</sup> + e <sup>-</sup> → *OH + CH <sub>4</sub> + H <sub>2</sub> O  | -0.754 |
|                                                | *CH <sub>3</sub> OH + H <sub>2</sub> O → * + CH <sub>3</sub> OH + H <sub>2</sub> O                                   | 0.465  |
| 8                                              | *OH + CH <sub>4</sub> + H <sub>2</sub> O + H <sup>+</sup> + e <sup>-</sup> → * + CH <sub>4</sub> + 2H <sub>2</sub> O | 0.095  |

Table S6. Gibbs free energy change for each protonation step of Mn-HAB electrocatalytic CO<sub>2</sub> reduction.

| n(H <sup>+</sup> + e <sup>-</sup> ) transferred | Chemical reaction equation                                                                                                             | ΔG     |
|-------------------------------------------------|----------------------------------------------------------------------------------------------------------------------------------------|--------|
| 1                                               | * + CO <sub>2</sub> + H <sup>+</sup> + e <sup>-</sup> → *COOH                                                                          | -0.263 |
|                                                 | * + CO <sub>2</sub> + H <sup>+</sup> + e <sup>-</sup> → *OCHO                                                                          | -0.826 |
| 2                                               | *COOH + H <sup>+</sup> + e <sup>-</sup> → *CO + H <sub>2</sub> O                                                                       | -0.555 |
|                                                 | *OCHO + H <sup>+</sup> + e <sup>-</sup> → *OCHOH                                                                                       | -0.307 |
| 3                                               | *CO + H <sub>2</sub> O + H <sup>+</sup> + e <sup>-</sup> → *CHO + H <sub>2</sub> O                                                     | 0.278  |
|                                                 | *CO + H <sub>2</sub> O + H <sup>+</sup> + e <sup>-</sup> → *COH + H <sub>2</sub> O                                                     | 1.601  |
|                                                 | *OCHOH + H <sup>+</sup> + e <sup>-</sup> → *CHO + H <sub>2</sub> O                                                                     | 0.593  |
|                                                 | *OCHOH + H <sup>+</sup> + e <sup>-</sup> → *OCH + H <sub>2</sub> O                                                                     | 2.190  |
| 4                                               | *CHO + H <sub>2</sub> O + H <sup>+</sup> + e <sup>-</sup> → *OCH <sub>2</sub> + H <sub>2</sub> O                                       | -0.078 |
| 5                                               | *OCH <sub>2</sub> + H <sub>2</sub> O + H <sup>+</sup> + e <sup>-</sup> → *OCH <sub>3</sub> + H <sub>2</sub> O                          | -0.909 |
|                                                 | *OCH <sub>2</sub> + H <sub>2</sub> O + H <sup>+</sup> + e <sup>-</sup> → * + HCHO + H <sub>2</sub> O + H <sup>+</sup> + e <sup>-</sup> | 0.231  |
| 6                                               | *OCH <sub>3</sub> + H <sub>2</sub> O + H <sup>+</sup> + e <sup>-</sup> → *CH <sub>3</sub> OH + H <sub>2</sub> O                        | -0.227 |
|                                                 | *OCH <sub>3</sub> + H <sub>2</sub> O + H <sup>+</sup> + e <sup>-</sup> → *O + CH <sub>4</sub> + H <sub>2</sub> O                       | -0.572 |
| 7                                               | *O + CH <sub>4</sub> + H <sub>2</sub> O + H <sup>+</sup> + e <sup>-</sup> → *OH + CH <sub>4</sub> + H <sub>2</sub> O                   | -0.795 |
|                                                 | *CH <sub>3</sub> OH + H <sub>2</sub> O + H <sup>+</sup> + e <sup>-</sup> → *OH + CH <sub>4</sub> + H <sub>2</sub> O                    | -1.141 |
|                                                 | *CH <sub>3</sub> OH + H <sub>2</sub> O → * + CH <sub>3</sub> OH + H <sub>2</sub> O                                                     | 0.273  |
| 8                                               | *OH + CH <sub>4</sub> + H <sub>2</sub> O + H <sup>+</sup> + e <sup>-</sup> → * + CH <sub>4</sub> + 2H <sub>2</sub> O                   | 0.143  |

Table S7. Gibbs free energy change for each protonation step of Fe-HAB electrocatalytic CO<sub>2</sub> reduction.

| n(H <sup>+</sup> + e <sup>-</sup> ) transferred | Chemical reaction equation                                                                                                             | ΔG     |
|-------------------------------------------------|----------------------------------------------------------------------------------------------------------------------------------------|--------|
| 1                                               | * + CO <sub>2</sub> + H <sup>+</sup> + e <sup>-</sup> → *COOH                                                                          | -0.351 |
|                                                 | * + CO <sub>2</sub> + H <sup>+</sup> + e <sup>-</sup> → *OCHO                                                                          | -0.653 |
| 2                                               | *COOH + H <sup>+</sup> + e <sup>-</sup> → *CO + H <sub>2</sub> O                                                                       | -0.350 |
|                                                 | *OCHO + H <sup>+</sup> + e <sup>-</sup> → *OCHOH                                                                                       | 0.514  |
| 3                                               | *CO + H <sub>2</sub> O + H <sup>+</sup> + e <sup>-</sup> → *CHO + H <sub>2</sub> O                                                     | 0.101  |
|                                                 | *CO + H <sub>2</sub> O + H <sup>+</sup> + e <sup>-</sup> → *COH + H <sub>2</sub> O                                                     | 1.806  |
| 4                                               | *CHO + H <sub>2</sub> O + H <sup>+</sup> + e <sup>-</sup> → *OCH <sub>2</sub> + H <sub>2</sub> O                                       | 0.274  |
| 5                                               | *OCH <sub>2</sub> + H <sub>2</sub> O + H <sup>+</sup> + e <sup>-</sup> → *OCH <sub>3</sub> + H <sub>2</sub> O                          | -0.825 |
|                                                 | *OCH <sub>2</sub> + H <sub>2</sub> O + H <sup>+</sup> + e <sup>-</sup> → * + HCHO + H <sub>2</sub> O + H <sup>+</sup> + e <sup>-</sup> | 0.102  |
| 6                                               | *OCH <sub>3</sub> + H <sub>2</sub> O + H <sup>+</sup> + e <sup>-</sup> → *CH <sub>3</sub> OH + H <sub>2</sub> O                        | -0.020 |
|                                                 | *OCH <sub>3</sub> + H <sub>2</sub> O + H <sup>+</sup> + e <sup>-</sup> → *O + CH <sub>4</sub> + H <sub>2</sub> O                       | -0.329 |
| 7                                               | *O + CH <sub>4</sub> + H <sub>2</sub> O + H <sup>+</sup> + e <sup>-</sup> → *OH + CH <sub>4</sub> + H <sub>2</sub> O                   | -0.778 |
|                                                 | *CH <sub>3</sub> OH + H <sub>2</sub> O + H <sup>+</sup> + e <sup>-</sup> → *OH + CH <sub>4</sub> + H <sub>2</sub> O                    | -1.088 |
|                                                 | *CH <sub>3</sub> OH + H <sub>2</sub> O → * + CH <sub>3</sub> OH + H <sub>2</sub> O                                                     | 0.098  |
| 8                                               | *OH + CH <sub>4</sub> + H <sub>2</sub> O + H <sup>+</sup> + e <sup>-</sup> → * + CH <sub>4</sub> + 2H <sub>2</sub> O                   | -0.016 |

Table S8. Gibbs free energy change for each protonation step of Ti-HAB electrocatalytic CO<sub>2</sub> reduction.

| n(H <sup>+</sup> +e <sup>-</sup> )transferred | Chemical reaction equation                                                                                           | ΔG     |
|-----------------------------------------------|----------------------------------------------------------------------------------------------------------------------|--------|
| 1                                             | * + CO <sub>2</sub> + H <sup>+</sup> + e <sup>-</sup> → *COOH                                                        | -1.726 |
|                                               | * + CO <sub>2</sub> + H <sup>+</sup> + e <sup>-</sup> → *OCHO                                                        | -2.126 |
| 2                                             | *COOH + H <sup>+</sup> + e <sup>-</sup> → *CO + H <sub>2</sub> O                                                     | 0.569  |
|                                               | *OCHO + H <sup>+</sup> + e <sup>-</sup> → *OCHOH                                                                     | -1.149 |
| 3                                             | *CO + H <sub>2</sub> O + H <sup>+</sup> + e <sup>-</sup> → *CHO + H <sub>2</sub> O                                   | -0.363 |
|                                               | *CO + H <sub>2</sub> O + H <sup>+</sup> + e <sup>-</sup> → *COH + H <sub>2</sub> O                                   | 1.127  |
|                                               | *OCHOH + H <sup>+</sup> + e <sup>-</sup> → *CHO + H <sub>2</sub> O                                                   | 1.755  |
|                                               | *OCHOH + H <sup>+</sup> + e <sup>-</sup> → *OCH + H <sub>2</sub> O                                                   | 2.523  |
| 4                                             | *CHO + H <sub>2</sub> O + H <sup>+</sup> + e <sup>-</sup> → *OCH <sub>2</sub> + H <sub>2</sub> O                     | -0.707 |
|                                               | *COH + H <sub>2</sub> O + H <sup>+</sup> + e <sup>-</sup> → *C + 2H <sub>2</sub> O                                   | 2.125  |
| 5                                             | *OCH <sub>2</sub> + H <sub>2</sub> O + H <sup>+</sup> + e <sup>-</sup> → *OCH <sub>3</sub> + H <sub>2</sub> O        | 0.313  |
| 6                                             | *OCH <sub>3</sub> + H <sub>2</sub> O + H <sup>+</sup> + e <sup>-</sup> → *CH <sub>3</sub> OH + H <sub>2</sub> O      | 0.193  |
|                                               | *OCH <sub>3</sub> + H <sub>2</sub> O + H <sup>+</sup> + e <sup>-</sup> → *O + CH <sub>4</sub> + H <sub>2</sub> O     | -1.780 |
| 7                                             | *O + CH <sub>4</sub> + H <sub>2</sub> O + H <sup>+</sup> + e <sup>-</sup> → *OH + CH <sub>4</sub> + H <sub>2</sub> O | 0.084  |
|                                               | *CH <sub>3</sub> OH + H <sub>2</sub> O + H <sup>+</sup> + e <sup>-</sup> → *OH + CH <sub>4</sub> + H <sub>2</sub> O  | -1.889 |
| 8                                             | *OH + CH <sub>4</sub> + H <sub>2</sub> O + H <sup>+</sup> + e <sup>-</sup> → * + CH <sub>4</sub> + 2H <sub>2</sub> O | 1.140  |

Table S9. Gibbs free energy change for each protonation step of Sc-HAB electrocatalytic CO<sub>2</sub> reduction.

| n(H <sup>+</sup> +e <sup>-</sup> )transferred | Chemical reaction equation                                                                                           | ΔG     |
|-----------------------------------------------|----------------------------------------------------------------------------------------------------------------------|--------|
| 1                                             | * + CO <sub>2</sub> + H <sup>+</sup> + e <sup>-</sup> → *COOH                                                        | -0.445 |
|                                               | * + CO <sub>2</sub> + H <sup>+</sup> + e <sup>-</sup> → *OCHO                                                        | -2.285 |
| 2                                             | *COOH + H <sup>+</sup> + e <sup>-</sup> → *CO + H <sub>2</sub> O                                                     | 0.071  |
|                                               | *OCHO + H <sup>+</sup> + e <sup>-</sup> → *OCHOH                                                                     | -0.157 |
| 3                                             | *CO + H <sub>2</sub> O + H <sup>+</sup> + e <sup>-</sup> → *CHO + H <sub>2</sub> O                                   | 0.223  |
|                                               | *CO + H <sub>2</sub> O + H <sup>+</sup> + e <sup>-</sup> → *COH + H <sub>2</sub> O                                   | 1.489  |
|                                               | *OCHOH + H <sup>+</sup> + e <sup>-</sup> → *CHO + H <sub>2</sub> O                                                   | 2.292  |
|                                               | *OCHOH + H <sup>+</sup> + e <sup>-</sup> → *OCH + H <sub>2</sub> O                                                   | 2.710  |
| 4                                             | *CHO + H <sub>2</sub> O + H <sup>+</sup> + e <sup>-</sup> → *OCH <sub>2</sub> + H <sub>2</sub> O                     | -1.277 |
| 5                                             | *OCH <sub>2</sub> + H <sub>2</sub> O + H <sup>+</sup> + e <sup>-</sup> → *OCH <sub>3</sub> + H <sub>2</sub> O        | 0.294  |
| 6                                             | *OCH <sub>3</sub> + H <sub>2</sub> O + H <sup>+</sup> + e <sup>-</sup> → *CH <sub>3</sub> OH + H <sub>2</sub> O      | -1.128 |
|                                               | *OCH <sub>3</sub> + H <sub>2</sub> O + H <sup>+</sup> + e <sup>-</sup> → *O + CH <sub>4</sub> + H <sub>2</sub> O     | -1.621 |
| 7                                             | *O + CH <sub>4</sub> + H <sub>2</sub> O + H <sup>+</sup> + e <sup>-</sup> → *OH + CH <sub>4</sub> + H <sub>2</sub> O | 0.038  |
|                                               | *CH <sub>3</sub> OH + H <sub>2</sub> O + H <sup>+</sup> + e <sup>-</sup> → *OH + CH <sub>4</sub> + H <sub>2</sub> O  | -0.455 |
| 8                                             | *OH + CH <sub>4</sub> + H <sub>2</sub> O + H <sup>+</sup> + e <sup>-</sup> → * + CH <sub>4</sub> + 2H <sub>2</sub> O | -0.064 |

Table S10. Gibbs free energy change for each protonation step of V-HAB electrocatalytic CO<sub>2</sub> reduction.

| n(H <sup>+</sup> +e <sup>-</sup> )transferred | Chemical reaction equation                                                                                           | ΔG     |
|-----------------------------------------------|----------------------------------------------------------------------------------------------------------------------|--------|
| 1                                             | * + CO <sub>2</sub> + H <sup>+</sup> + e <sup>-</sup> → *COOH                                                        | -0.803 |
|                                               | * + CO <sub>2</sub> + H <sup>+</sup> + e <sup>-</sup> → *OCHO                                                        | -0.713 |
| 2                                             | *COOH + H <sup>+</sup> + e <sup>-</sup> → *CO + H <sub>2</sub> O                                                     | -0.562 |
|                                               | *OCHO + H <sup>+</sup> + e <sup>-</sup> → *OCHOH                                                                     | -1.404 |
| 3                                             | *CO + H <sub>2</sub> O + H <sup>+</sup> + e <sup>-</sup> → *CHO + H <sub>2</sub> O                                   | 0.453  |
|                                               | *CO + H <sub>2</sub> O + H <sup>+</sup> + e <sup>-</sup> → *COH + H <sub>2</sub> O                                   | 1.523  |
|                                               | *OCHOH + H <sup>+</sup> + e <sup>-</sup> → *CHO + H <sub>2</sub> O                                                   | 1.205  |
|                                               | *OCHOH + H <sup>+</sup> + e <sup>-</sup> → *OCH + H <sub>2</sub> O                                                   | 0.271  |
| 4                                             | *OCH + H <sub>2</sub> O + H <sup>+</sup> + e <sup>-</sup> → *OCH <sub>2</sub> + H <sub>2</sub> O                     | -0.677 |
| 5                                             | *OCH <sub>2</sub> + H <sub>2</sub> O + H <sup>+</sup> + e <sup>-</sup> → *OCH <sub>3</sub> + H <sub>2</sub> O        | -0.359 |
| 6                                             | *OCH <sub>3</sub> + H <sub>2</sub> O + H <sup>+</sup> + e <sup>-</sup> → *CH <sub>3</sub> OH + H <sub>2</sub> O      | -0.001 |
|                                               | *OCH <sub>3</sub> + H <sub>2</sub> O + H <sup>+</sup> + e <sup>-</sup> → *O + CH <sub>4</sub> + H <sub>2</sub> O     | -0.271 |
| 7                                             | *O + CH <sub>4</sub> + H <sub>2</sub> O + H <sup>+</sup> + e <sup>-</sup> → *OH + CH <sub>4</sub> + H <sub>2</sub> O | 0.189  |
|                                               | *CH <sub>3</sub> OH + H <sub>2</sub> O + H <sup>+</sup> + e <sup>-</sup> → *OH + CH <sub>4</sub> + H <sub>2</sub> O  | -0.080 |
| 8                                             | *OH + CH <sub>4</sub> + H <sub>2</sub> O + H <sup>+</sup> + e <sup>-</sup> → * + CH <sub>4</sub> + 2H <sub>2</sub> O | 0.079  |
|                                               | *CH <sub>3</sub> + 2H <sub>2</sub> O + H <sup>+</sup> + e <sup>-</sup> → * + CH <sub>4</sub> + 2H <sub>2</sub> O     | -0.225 |

Table S11. Gibbs free energy change for each protonation step of Cu-HAB electrocatalytic CO<sub>2</sub> reduction.

| n(H <sup>+</sup> +e <sup>-</sup> )transferred | Chemical reaction equation                                                                                                             | ΔG     |
|-----------------------------------------------|----------------------------------------------------------------------------------------------------------------------------------------|--------|
| 1                                             | * + CO <sub>2</sub> + H <sup>+</sup> + e <sup>-</sup> → *COOH                                                                          | 0.162  |
|                                               | * + CO <sub>2</sub> + H <sup>+</sup> + e <sup>-</sup> → *OCHO                                                                          | -0.742 |
| 2                                             | *COOH + H <sup>+</sup> + e <sup>-</sup> → *CO + H <sub>2</sub> O                                                                       | -0.383 |
|                                               | *OCHO + H <sup>+</sup> + e <sup>-</sup> → *OCHOH                                                                                       | -0.564 |
| 3                                             | *CO + H <sub>2</sub> O + H <sup>+</sup> + e <sup>-</sup> → *CHO + H <sub>2</sub> O                                                     | 0.178  |
|                                               | *CO + H <sub>2</sub> O + H <sup>+</sup> + e <sup>-</sup> → *COH + H <sub>2</sub> O                                                     | 0.751  |
|                                               | *OCHOH + H <sup>+</sup> + e <sup>-</sup> → *CHO + H <sub>2</sub> O                                                                     | 1.264  |
|                                               | *OCHOH + H <sup>+</sup> + e <sup>-</sup> → *OCH + H <sub>2</sub> O                                                                     | 2.111  |
|                                               | *CO + H <sub>2</sub> O → * + CO + H <sub>2</sub> O                                                                                     | 0.860  |
|                                               | *OCHOH → * + HCOOH                                                                                                                     | 1.223  |
| 4                                             | *CHO + H <sub>2</sub> O + H <sup>+</sup> + e <sup>-</sup> → *OCH <sub>2</sub> + H <sub>2</sub> O                                       | -0.809 |
| 5                                             | *OCH <sub>2</sub> + H <sub>2</sub> O + H <sup>+</sup> + e <sup>-</sup> → *OCH <sub>3</sub> + H <sub>2</sub> O                          | -0.043 |
|                                               | *OCH <sub>2</sub> + H <sub>2</sub> O + H <sup>+</sup> + e <sup>-</sup> → * + HCHO + H <sub>2</sub> O + H <sup>+</sup> + e <sup>-</sup> | 0.306  |
| 6                                             | *OCH <sub>3</sub> + H <sub>2</sub> O + H <sup>+</sup> + e <sup>-</sup> → *CH <sub>3</sub> OH + H <sub>2</sub> O                        | -1.258 |
|                                               | *OCH <sub>3</sub> + H <sub>2</sub> O + H <sup>+</sup> + e <sup>-</sup> → *O + CH <sub>4</sub> + H <sub>2</sub> O                       | 1.175  |
| 7                                             | *CH <sub>3</sub> OH + H <sub>2</sub> O + H <sup>+</sup> + e <sup>-</sup> → *OH + CH <sub>4</sub> + H <sub>2</sub> O                    | 0.181  |
|                                               | *CH <sub>3</sub> OH + H <sub>2</sub> O → * + CH <sub>3</sub> OH + H <sub>2</sub> O                                                     | 0.705  |
| 8                                             | *OH + CH <sub>4</sub> + H <sub>2</sub> O + H <sup>+</sup> + e <sup>-</sup> → * + CH <sub>4</sub> + 2H <sub>2</sub> O                   | -0.714 |

Table S12. Gibbs free energy change for each protonation step of Cr-HAB electrocatalytic CO<sub>2</sub> reduction.

| n(H <sup>+</sup> +e <sup>-</sup> )transferred | Chemical reaction equation                                                                                                          | ΔG     |
|-----------------------------------------------|-------------------------------------------------------------------------------------------------------------------------------------|--------|
| 1                                             | * + CO <sub>2</sub> + H <sup>+</sup> + e <sup>-</sup> → *COOH                                                                       | -0.572 |
|                                               | * + CO <sub>2</sub> + H <sup>+</sup> + e <sup>-</sup> → *OCHO                                                                       | -1.344 |
| 2                                             | *COOH + H <sup>+</sup> + e <sup>-</sup> → *CO + H <sub>2</sub> O                                                                    | -0.276 |
|                                               | *OCHO + H <sup>+</sup> + e <sup>-</sup> → *OCHOH                                                                                    | -0.083 |
| 3                                             | *CO + H <sub>2</sub> O + H <sup>+</sup> + e <sup>-</sup> → *CHO + H <sub>2</sub> O                                                  | 0.270  |
|                                               | *CO + H <sub>2</sub> O + H <sup>+</sup> + e <sup>-</sup> → *COH + H <sub>2</sub> O                                                  | 1.427  |
|                                               | *OCHOH + H <sup>+</sup> + e <sup>-</sup> → *CHO + H <sub>2</sub> O                                                                  | 0.848  |
|                                               | *OCHOH + H <sup>+</sup> + e <sup>-</sup> → *OCH + H <sub>2</sub> O                                                                  | 2.308  |
| 4                                             | *CHO + H <sub>2</sub> O + H <sup>+</sup> + e <sup>-</sup> → *OCH <sub>2</sub> + H <sub>2</sub> O                                    | -0.105 |
| 5                                             | *OCH <sub>2</sub> + H <sub>2</sub> O + H <sup>+</sup> + e <sup>-</sup> → *OCH <sub>3</sub> + H <sub>2</sub> O                       | -1.211 |
|                                               | *OCH <sub>2</sub> + H <sub>2</sub> O + H <sup>+</sup> + e <sup>-</sup> → * + HCHO + H <sub>2</sub> O+H <sup>+</sup> +e <sup>-</sup> | 0.562  |
| 6                                             | *OCH <sub>3</sub> + H <sub>2</sub> O + H <sup>+</sup> + e <sup>-</sup> → *CH <sub>3</sub> OH + H <sub>2</sub> O                     | 0.270  |
|                                               | *OCH <sub>3</sub> + H <sub>2</sub> O + H <sup>+</sup> + e <sup>-</sup> → *O + CH <sub>4</sub> + H <sub>2</sub> O                    | -0.856 |
| 7                                             | *O + CH <sub>4</sub> + H <sub>2</sub> O + H <sup>+</sup> + e <sup>-</sup> → *OH + CH <sub>4</sub> + H <sub>2</sub> O                | -0.212 |
|                                               | *CH <sub>3</sub> OH + H <sub>2</sub> O + H <sup>+</sup> + e <sup>-</sup> → *OH + CH <sub>4</sub> + H <sub>2</sub> O                 | -1.339 |
|                                               | *CH <sub>3</sub> OH + H <sub>2</sub> O → * + CH <sub>3</sub> OH + H <sub>2</sub> O                                                  | 0.803  |
| 8                                             | *OH + CH <sub>4</sub> + H <sub>2</sub> O + H <sup>+</sup> + e <sup>-</sup> → * + CH <sub>4</sub> + 2H <sub>2</sub> O                | 0.495  |
